# Supplementary material for: Hierarchical skeletal architecture and ecological tradeoffs in Pacific Northwest sea stars
Source: Research Square preprint supplement (doi:10.21203/rs.3.rs-8739467/v1), 2026-02-03
Supplement: Supplementary file 1 [file bb202c2acfcf77da42e4a67e.xlsx]

## Sheet: Table Sup.1
Species	Rays	Pedicellariae presence	Spines per cluster	Clusters of spines per ray band	Teeth per oral ossicle	Spines per adambulacral ossicle	Skeleton : Whole body volume ratio	Central disc radius : longest ray length	Ray skeleton : ray volume	Surface area : volume	Ambulacral groove skeleton : ray skeleton	Carinal (ossicle + spine) : whole ray band volume	Ray band spines : whole ray band volume	Teeth length : central disc radius
Crossaster papposus	11	0	10	10	7	10	0.166807	2.2	0.337285	17.4366	0.610881	0.0283486	0.198687	0.114857
Dermasterias imbricata	5	0	0	0	3	2	0.264272	2.35714	0.341083	8.41868	0.35449	0.0270064	0.019919	0.119048
Evasterias troschelii	5	1	1	8	2	1	0.259468	4.875	0.34727	20.7812	0.313769	0.0826129	0.148024	0.08125
Henricia sp.	5	0	4	16	4	6	0.219258	4.16667	0.390848	16.6082	0.413769	0.0351835	0.112914	0.158333
Leptasterias sp.	6	1	1	8	2	1	0.394675	3	0.431057	14.5333	0.306719	0.084611	0.156812	0.125
Mediaster aequalis	5	0	1	0	6	9	0.370078	2.82143	0.692547	7.99538	0.283199	0.0164262	0.148652	0.0690476
Pisaster ochraceus	5	1	1	11	3	1	0.190053	2.85714	0.342515	16.259	0.235748	0.0453767	0.167849	0.0714286
Pteraster tesselatus	5	0	10	20	6	5	0.0300494	1.56522	0.269419	26.7005	0.627972	0.0160368	0.417481	0.0891304
Solaster stimpsoni	10	0	8	30	7	6	0.245878	3.13043	0.353781	15.8944	0.398384	0.0325806	0.139714	0.0807453

## Sheet: Table Sup.2
Species	Segment	Voxels	Volume.mm3	Volume.cm3	Surface.area.mm2
Crossaster papposus	Ambulacral groove	1801626	1.22776	0.00122776	14.6658
Crossaster papposus	Adambulacral spines	424658	0.289393	0.000289393	9.06368
Crossaster papposus	Ray tip skeleton volume	45407585	30.944	0.030944	520.513
Crossaster papposus	Ray tip volume	134626971	91.7445	0.0917445	432.414
Crossaster papposus	Carinal ossicle	129195	0.0880428	8.8e-05	1.4363
Crossaster papposus	Carinal spine	35888	0.0244567	2.45e-05	0.938271
Crossaster papposus	Carinal Reticular Marginal ossicle combined	2864668	1.95219	0.00195219	28.5979
Crossaster papposus	Carinal Reticular Marginal spines	732362	0.499084	0.000499084	19.9923
Crossaster papposus	Ray band	5823314	3.96843	0.00396843	69.1958
Dermasterias imbricata	Ambulacral groove	2021138	1.37735	0.00137735	14.2478
Dermasterias imbricata	Adambulacral spines	311943	0.21258	0.00021258	3.98348
Dermasterias imbricata	Ray tip skeleton volume	120847502	82.3542	0.0823542	752.387
Dermasterias imbricata	Ray tip volume	354304475	241.449	0.241449	605.529
Dermasterias imbricata	Carinal ossicle	422934	0.288218	0.000288218	2.89207
Dermasterias imbricata	Carinal Reticular Marginal ossicle combined	13327400	9.08225	0.00908225	71.9311
Dermasterias imbricata	Ray band	15660439	10.6722	0.0106722	89.8458
Evasterias troschelii	Ambulacral groove	147681	0.10064	0.00010064	2.54614
Evasterias troschelii	Adambulacral spines	39323	0.0267975	2.68e-05	0.837963
Evasterias troschelii	Ray tip skeleton volume	32079930	21.8616	0.0218616	372.816
Evasterias troschelii	Ray tip volume	92377624	62.9528	0.0629528	229.266
Evasterias troschelii	Carinal ossicle	81970	0.0558603	5.59e-05	0.837251
Evasterias troschelii	Carinal pedicellariae	40737	0.0277611	2.78e-05	1.30808
Evasterias troschelii	Carinal spine	44739	0.0304884	3.05e-05	0.568595
Evasterias troschelii	Carinal Reticular Marginal ossicle combined	993103	0.676772	0.000676772	10.3715
Evasterias troschelii	Carinal Reticular Marginal pedicellariae	165950	0.11309	0.00011309	5.46723
Evasterias troschelii	Carinal Reticular Marginal spines	187711	0.12792	0.00012792	2.84089
Evasterias troschelii	Ray band	1533768	1.04522	0.00104522	21.7209
Henricia sp.	Ambulacral groove	549334	0.374356	0.000374356	5.63362
Henricia sp.	Adambulacral spines	116236	0.0792116	7.92e-05	2.51071
Henricia sp.	Ray tip skeleton volume	38362718	26.1431	0.0261431	411.137
Henricia sp.	Ray tip volume	98152375	66.8881	0.0668881	309.539
Henricia sp.	Carinal ossicle	75500	0.0514511	5.15e-05	0.924582
Henricia sp.	Carinal spine	8599	0.00585998	5.86e-06	0.309464
Henricia sp.	Carinal Reticular Marginal ossicle combined	1571068	1.07064	0.00107064	15.2038
Henricia sp.	Carinal Reticular Marginal spines	153661	0.104716	0.000104716	5.82782
Henricia sp.	Ray band	2390299	1.62892	0.00162892	27.0535
Leptasterias sp.	Ambulacral groove	502768	0.342622	0.000342622	5.84493
Leptasterias sp.	Adambulacral spines	92792	0.0632351	6.32e-05	1.4797
Leptasterias sp.	Ray tip skeleton volume	37343348	25.4484	0.0254484	390.043
Leptasterias sp.	Ray tip volume	86631872	59.0372	0.0590372	322.975
Leptasterias sp.	Carinal ossicle	295244	0.201201	0.000201201	2.43745
Leptasterias sp.	Carinal pedicellariae	26786	0.0182539	1.83e-05	0.994927
Leptasterias sp.	Carinal spine	42128	0.0287091	2.87e-05	0.641217
Leptasterias sp.	Carinal Reticular Marginal ossicle combined	2629385	1.79185	0.00179185	18.0201
Leptasterias sp.	Carinal Reticular Marginal pedicellariae	230200	0.156875	0.000156875	8.03499
Leptasterias sp.	Carinal Reticular Marginal spines	532473	0.362865	0.000362865	7.33061
Leptasterias sp.	Ray band	3987343	2.71726	0.00271726	39.4908
Mediaster aequalis	Ambulacral groove	3259306	2.22113	0.00222113	18.5062
Mediaster aequalis	Adambulacral spines	376303	0.25644	0.00025644	5.8277
Mediaster aequalis	Ray tip skeleton volume	140824046	95.9676	0.0959676	800.347
Mediaster aequalis	Ray tip volume	203341739	138.572	0.138572	293.528
Mediaster aequalis	Carinal ossicle	295417	0.201318	0.000201318	2.24233
Mediaster aequalis	Carinal spine	69410	0.047301	4.73e-05	1.7444
Mediaster aequalis	Carinal Reticular Marginal ossicle combined	15649112	10.6644	0.0106644	57.8704
Mediaster aequalis	Carinal Reticular Marginal spines	2925261	1.99348	0.00199348	66.076
Mediaster aequalis	Ray band	22209982	15.1355	0.0151355	121.014
Pisaster ochraceus	Ambulacral groove	520885	0.354969	0.000354969	6.37836
Pisaster ochraceus	Adambulacral spines	80004	0.0545205	5.45e-05	1.41073
Pisaster ochraceus	Ray tip skeleton volume	57629385	39.2728	0.0392728	628.743
Pisaster ochraceus	Ray tip volume	168253731	114.66	0.11466	342.549
Pisaster ochraceus	Carinal ossicle	257602	0.175549	0.000175549	2.16641
Pisaster ochraceus	Carinal pedicellariae	20785	0.0141644	1.42e-05	1.06242
Pisaster ochraceus	Carinal spine	69512	0.0473705	4.74e-05	0.832004
Pisaster ochraceus	Carinal Reticular Marginal ossicle combined	4887931	3.33099	0.00333099	38.6602
Pisaster ochraceus	Carinal Reticular Marginal pedicellariae	590048	0.402101	0.000402101	23.2358
Pisaster ochraceus	Carinal Reticular Marginal spines	1129997	0.770061	0.000770061	11.9582
Pisaster ochraceus	Ray band	7208865	4.91264	0.00491264	79.8744
Pteraster tesselatus	Ambulacral groove	1706349	1.16283	0.00116283	17.9346
Pteraster tesselatus	Adambulacral spines	965537	0.657986	0.000657986	15.1486
Pteraster tesselatus	Ray tip skeleton volume	75683541	51.5762	0.0515762	1173.19
Pteraster tesselatus	Ray tip volume	280914555	191.435	0.191435	795.729
Pteraster tesselatus	Carinal ossicle	54346	0.0370353	3.7e-05	0.86815
Pteraster tesselatus	Carinal spine	57233	0.0390027	3.9e-05	1.99964
Pteraster tesselatus	Carinal Reticular Marginal ossicle combined	2346642	1.59917	0.00159917	34.18
Pteraster tesselatus	Carinal Reticular Marginal spines	1939175	1.32149	0.00132149	62.9498
Pteraster tesselatus	Ray band	6957703	4.74148	0.00474148	126.6
Solaster stimpsoni	Ambulacral groove	1514131	1.03184	0.00103184	13.0578
Solaster stimpsoni	Adambulacral spines	204612	0.139437	0.000139437	4.21284
Solaster stimpsoni	Ray tip skeleton volume	82375306	56.1365	0.0561365	906.283
Solaster stimpsoni	Ray tip volume	232843506	158.676	0.158676	528.135
Solaster stimpsoni	Carinal ossicle	154888	0.105552	0.000105552	1.45295
Solaster stimpsoni	Carinal spine	24044	0.0163853	1.64e-05	0.588536
Solaster stimpsoni	Carinal Reticular Marginal ossicle combined	3210555	2.1879	0.0021879	29.3048
Solaster stimpsoni	Carinal Reticular Marginal spines	562699	0.383464	0.000383464	15.6631
Solaster stimpsoni	Ray band	5491997	3.74264	0.00374264	59.4871

## Sheet: Table Sup.3
Species	CnidarianPrey	SpongePrey	TunicatePrey	EchinodermPrey	GastropodPrey	BivalvePrey	BarnaclePrey	DietEH	EchinodermPred	RockHabitat	CobbleHabitat	SandMudHabitat	Habitat.Rno	Intertidal
Crossaster papposus	1	0	1	0	1	0	0	Mix	1	0	1	1	Mix	Subtidal
Dermasterias imbricata	1	0	0	1	0	0	0	Mix	0	1	0	1	Mix	Intertidal
Evasterias troschelii	0	0	1	0	1	1	1	Mix	1	1	1	1	Mix	Intertidal
Henricia sp.	0	1	1	0	0	0	0	Soft	1	1	1	1	Mix	Intertidal
Leptasterias sp.	0	0	0	1	1	0	1	Hard	1	1	0	0	Rocky	Intertidal
Mediaster aequalis	1	1	0	0	0	0	0	Soft	1	1	0	1	Mix	Subtidal
Pisaster ochraceus	0	0	0	0	1	1	1	Hard	0	1	0	0	Rocky	Intertidal
Pteraster tesselatus	0	1	1	0	0	0	0	Soft	0	1	0	0	Rocky	Subtidal
Solaster stimpsoni	0	0	0	1	0	0	0	Hard	1	1	1	1	Mix	Subtidal

## Sheet: Table Sup.4
	ArmNumber	Pedicellariae	Branching	SpineClusters	TeethNumber	AmbulacSpines	WholeSkeletonFraction	ArmDiscRadius	ArmSkeletonFraction	SAfraction	AmbulacSkeleton	CarinalFraction	SpineFraction	TeethDisc
ArmNumber	1	-0.312772	0.660439	0.441347	0.646899	0.540532	-0.110098	-0.213575	-0.193202	0.052574	0.463203	-0.147901	0.0167768	0.0105568
Pedicellariae		1	-0.537853	-0.192421	-0.765532	-0.761042	0.301132	0.433718	-0.098177	0.146545	-0.58421	0.869627	-0.0723426	-0.210313
Branching			1	0.686824	0.794593	0.596938	-0.698248	-0.445892	-0.429764	0.604018	0.899181	-0.460842	0.651951	0.0303795
SpineClusters				1	0.45178	0.126471	-0.48612	-0.00495118	-0.485393	0.587755	0.398291	-0.117877	0.413229	-0.0343237
TeethNumber					1	0.87582	-0.376375	-0.493059	0.0987633	0.103188	0.626454	-0.754982	0.387175	-0.20874
AmbulacSpines						1	-0.144272	-0.29962	0.367474	-0.0969877	0.534519	-0.680118	0.188954	0.0304365
WholeSkeletonFraction							1	0.391587	0.710452	-0.749879	-0.727379	0.447598	-0.672708	0.0481647
ArmDiscRadius								1	0.118305	-0.0124484	-0.508227	0.621071	-0.457482	0.13057
ArmSkeletonFraction									1	-0.66065	-0.472528	-0.118111	-0.280611	-0.199619
SAfraction										1	0.581301	0.127316	0.797737	-0.0641168
AmbulacSkeleton											1	-0.462039	0.630309	0.247145
CarinalFraction												1	-0.220503	0.0943978
SpineFraction													1	-0.276667

## Sheet: Table Sup.5
NS is p < 0.05
	Diet	Interdidal	Rocky or Mix
Arm Number	NS	NS	NS
Pedicellariae	NS	NS	NS
Branching	NS	p = 0.023	NS
SpineClusters	NS	NS	NS
TeethNumber	NS	p = 0.00014	NS
AmbulacSpines	NS	p = 0.01	NS
WholeSkeletonFraction	NS	NS	NS
ArmDiscRadius	NS	NS	NS
ArmSkeletonFraction	NS	NS	NS
SAfraction	NS	NS	NS
AmbulacSkeleton	NS	NS	NS
CarinalFraction	NS	NS	NS
SpineFraction	NS	NS	NS
TeethDisc	NS	NS	NS
